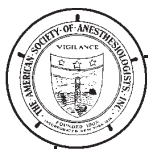

## ANNOUNCEMENT AND CALL FOR ABSTRACTS

## ANNUAL JOURNAL SYMPOSIUM

**“A Precarious Breath: Diagnosis and Management of Difficult Airways and Obstructive Sleep Apnea”**

The American Society of Anesthesiologists (ASA) and its journal *ANESTHESIOLOGY* announce the 17th annual Journal Symposium, to be held at the Annual Meeting of the ASA in October 2008, in Orlando, Florida. The Journal Symposium highlights emerging and important concepts in anesthesia research and clinical practice.

This year's Journal Symposium will take place Tuesday, October 21, 2008, from 8:00 a.m.–11:00 a.m.

The Symposium format will be an oral abstract presentation session in conjunction with formal lectures by three invited international experts. Abstracts for inclusion in the Journal Symposium will be chosen from among those submitted for presentation at the ASA's Annual Meeting. Abstract selections will be made by the Symposium organizers, *ANESTHESIOLOGY* Editors Jerrold Lerman, M.D., of the Women and Children's Hospital of Buffalo, State University of New York, Buffalo, New York, and Evan D. Kharasch, M.D., Ph.D., of Washington University, St. Louis, Missouri. Investigators from around the world with an interest in this subject are encouraged to submit their work to the ASA for the Annual Meeting. Abstracts from both basic and clinical sciences are encouraged. Studies on evaluation and management of the difficult airway, as well as studies examining or evaluating the pathophysiology and management of obstructive sleep apnea in both adult and pediatric populations, are encouraged. Abstracts should be submitted *via* the usual online process (which can be accessed *via* the Web sites [www.ASAhq.org](http://www.ASAhq.org) and [www.anesthesiology.org](http://www.anesthesiology.org)). Interested individuals should be sure to check the Journal Symposium box on the abstract submission form to be considered for inclusion in this special session. The deadline for abstract submission is March 31, 2008.

The authors of abstracts that are selected for the Symposium will also be offered an opportunity to submit their work to *ANESTHESIOLOGY*, for inclusion in the special Symposium issue to be published in the spring of 2009.

## ANNUAL ANESTHESIOLOGY/FAER SESSION

**“Anesthesia and the Developing Brain: Implications for Obstetrics and Pediatrics”**

*ANESTHESIOLOGY*, in conjunction with the Foundation for Anesthesia Education and Research (FAER), is pleased to announce the 1st annual joint conference, to be held at the 2008 American Society of Anesthesiologists (ASA) Annual Meeting, on Tuesday, October 21, 2008, in Orlando, Florida. The purpose of this session is to highlight an important and timely topic of research that has been developed by a previous FAER Awardee. The 1st annual conference will be organized by previous FAER Awardee Vesna Jevtovic-Todorovic, M.D., Ph.D., Associate Professor of Anesthesiology and Neuroscience, University of Virginia, and James C. Eisenach, M.D., Professor of Anesthesiology and Physiology & Pharmacology, Wake Forest University. Dr. Jevtovic-Todorovic has pioneered the study of anesthetic effects on the developing brain, and this session will emphasize new and innovative research on this topic and its clinical relevance.

The session format will be an oral abstract presentation session in conjunction with formal lectures by two invited international experts. Abstracts for inclusion in the *ANESTHESIOLOGY*/FAER Session will be chosen from among those submitted for presentation at the ASA's Annual Meeting. Abstract selections will be made by the Session's organizers. Investigators from around the world with an interest in this subject are encouraged to submit their work to the ASA for the Annual Meeting. Abstracts from both basic and clinical sciences are encouraged. Abstracts should be submitted *via* the usual online process (which can be accessed *via* the Web sites [www.ASAhq.org](http://www.ASAhq.org) and [www.anesthesiology.org](http://www.anesthesiology.org)). Interested individuals should be sure to check the *ANESTHESIOLOGY*/FAER Session box on the abstract submission form to be considered for inclusion in this special session. The deadline for abstract submission is March 31, 2008.

The authors of abstracts that are selected for the Session will also be offered an opportunity to submit their work to *ANESTHESIOLOGY*, for inclusion in the special Session issue to be published in the spring of 2009.
